# Supplementary material for: PTEN Is a Potent Suppressor of Small Cell Lung Cancer
Source: Oxford University Press journal article supplement (doi:10.1158/1541-7786.mcr-13-0554), 2014-01-31
Supplement: 15417786mcr130554-sup-tab1-2.xlsx [file 15417786mcr130554-sup-tab1-2.xlsx]

## Sheet: Supplemental Table 1
Supplemental Table 1: Primer sequences used for Real Time PCR
Gene	Species	mRNA	Sequence (5'-3')
Napsa	Mm	Sense	GCTGTTCCCATCCATTCAGT
	Mm	Antisense	GAATTTGGAGCCTGAGGAGG
Cdh1	Mm	Sense	AAAAGAAGGCTGTCCTTGGC
	Mm	Antisense	GAGGTCTACACCTTCCCGGT
Krt19	Mm	Sense	ACCACTACTTTAAGACCATCGAG
	Mm	Antisense	GTCTCAAACTTGGTTCTGAAGTC
Krt7	Mm	Sense	GGACATTGAGATCGCCACCTA
	Mm	Antisense	CCAGTGGAATTCACAACAGAGATA
Krt18	Mm	Sense	GTGGATGCCCCCAAATCTCA
	Mm	Antisense	CCTCAATCTGCTGAGACCAGT
Calca	Mm	Sense	GAACTTCAGGAAGCCCATGA
	Mm	Antisense	AAGAGTCACCGCTTCGCA
Syp	Mm	Sense	AGCCTGTCTCCTTGAACACG
	Mm	Antisense	GAGGGACCCTGTGACTTCAG
Ascl1	Mm	Sense	TTTTCCCCTTGTTTTTCTGC
	Mm	Antisense	TCTCCTGGGAATGGACTTTG
Actb	Mm	Sense	GGCTGTATTCCCCTCCATCG
	Mm	Antisense	CCAGTTGGTAACAATGCCATGT
Gene	Species	gDNA	Sequence (5'-3')
PTEN EX5B	Mm	Sense	AGTGCCCCAACATAAGGTCA
	Mm	Antisense	AACCCTTGGCATTGCAAACT
ACTB	Mm	Sense	GACGTTGACATCCGTAAAGA
	Mm	Antisense	GCAGTAATCTCCTTCTGCAT

## Sheet: Supplemental Table 2
Supplemental Table 2: Coverage of mouse exome samples
ID	10X	20X	cohort
6210tail	0.970646	0.892047	RBP53
6210luTN1	0.979279	0.930693	RBP53
6210livmet1	0.964658	0.876249	RBP53
6210livmet2	0.928139	0.769296	RBP53
6579tail	0.975691	0.916923	RBP53
6579luTN1	0.97473	0.909693	RBP53
6904tail	0.984167	0.940908	RBP53
6904livmet1	0.975725	0.911289	RBP53
6904luTN1	0.977758	0.927045	RBP53
6905tail	0.986171	0.959135	RBP53
6905luTN1	0.986846	0.954195	RBP53
6905luTN2	0.98646	0.952385	RBP53
7899tail	0.963119	0.867884	RBP53PTENlox/+
7899luTN1	0.937765	0.783071	RBP53PTENlox/+
7899luTN2	0.968949	0.887092	RBP53PTENlox/+
7899livmet1	0.935554	0.785941	RBP53PTENlox/+
6945tail	0.958688	0.854855	RBP53PTENlox/+
6945luTN1	0.941382	0.799665	RBP53PTENlox/+
6945livmet1	0.950028	0.840068	RBP53PTENlox/+
7143tail	0.970198	0.889198	RBP53PTENlox/+
7143luTN1	0.930229	0.761937	RBP53PTENlox/+
7143luTN2	0.958408	0.857597	RBP53PTENlox/+
7143livmet1	0.901247	0.684917	RBP53PTENlox/+
7143livmet2	0.969568	0.884008	RBP53PTENlox/+
7210tail	0.95048	0.82472	RBP53PTENlox/+
7210luTN1	0.955044	0.841131	RBP53PTENlox/+
7210luTN2	0.900359	0.693368	RBP53PTENlox/+
7210livmet1	0.955971	0.85436	RBP53PTENlox/+
7210livmet2	0.915945	0.735038	RBP53PTENlox/+
7810tail	0.989501	0.96686	RBP53PTENlox/+
7810luTN1	0.939384	0.793129	RBP53PTENlox/+
7874tail	0.912843	0.707816	RBP53PTENlox.lox
7874luTN1	0.966005	0.890069	RBP53PTENlox.lox
7874luTN2	0.970346	0.893889	RBP53PTENlox.lox
8390tail	0.962724	0.869684	RBP53PTENlox.lox
8390luTN1	0.974071	0.906362	RBP53PTENlox.lox
8390luTN2	0.973393	0.900864	RBP53PTENlox.lox
8398tail	0.940057	0.791437	RBP53PTENlox.lox
8398luTN2	0.970309	0.888919	RBP53PTENlox.lox
8398luN3	0.977027	0.917547	RBP53PTENlox.lox
